# Supplementary material
Source: MDPI journal article supplement (https://www.mdpi.com/2220-9964/11/9/481)
Supplement: s1 [file s1]

## Supplementary Materials

Supplementary S1. Maps of the eleven types of level-2 ecosystem services included in this study.

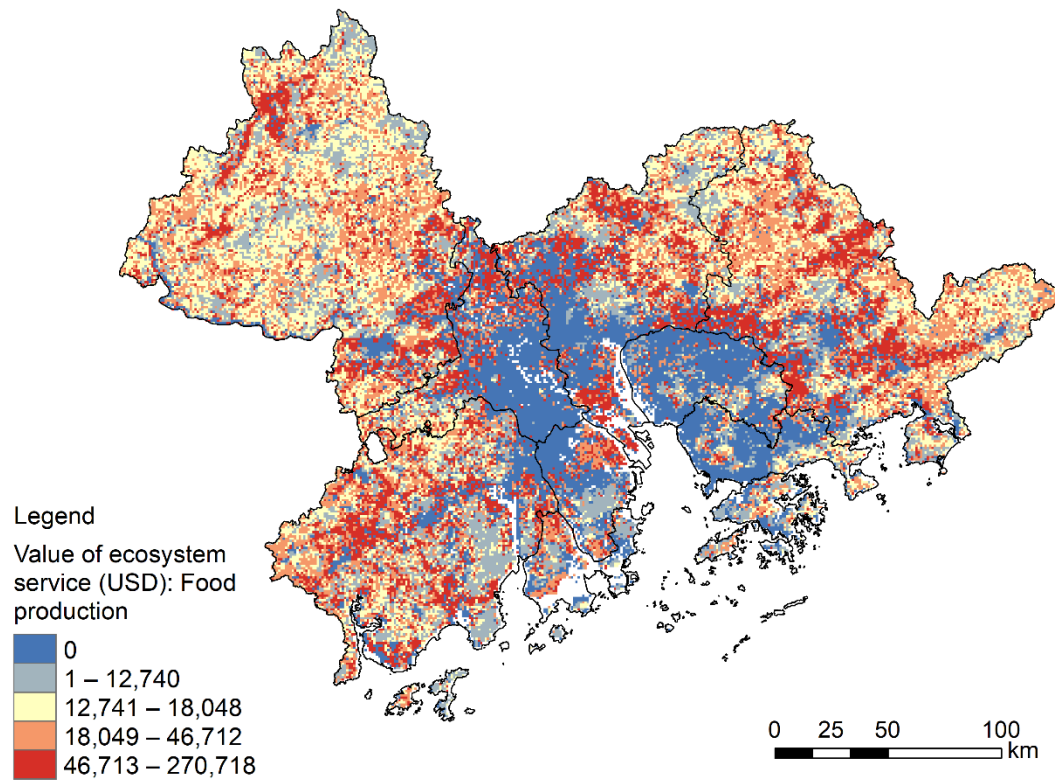

Figure S1. Value of ecosystem service (USD): Food production (FP).

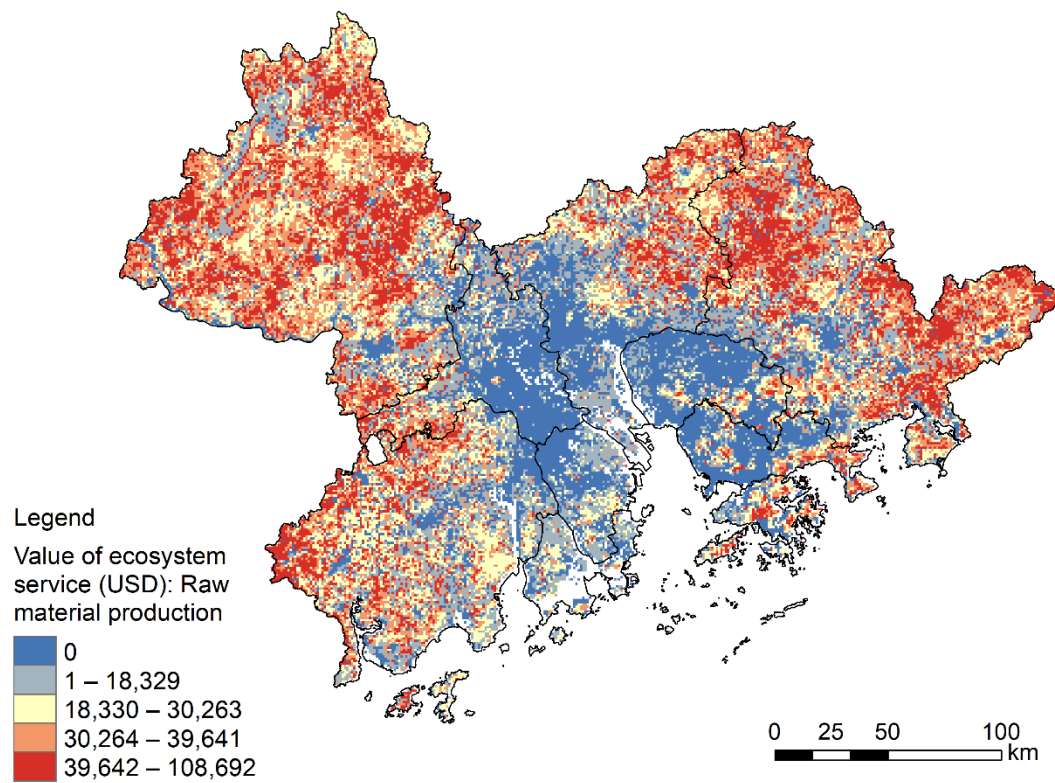

Figure S2. Value of ecosystem service (USD): Raw material production (RMP).

Supplementary Materials

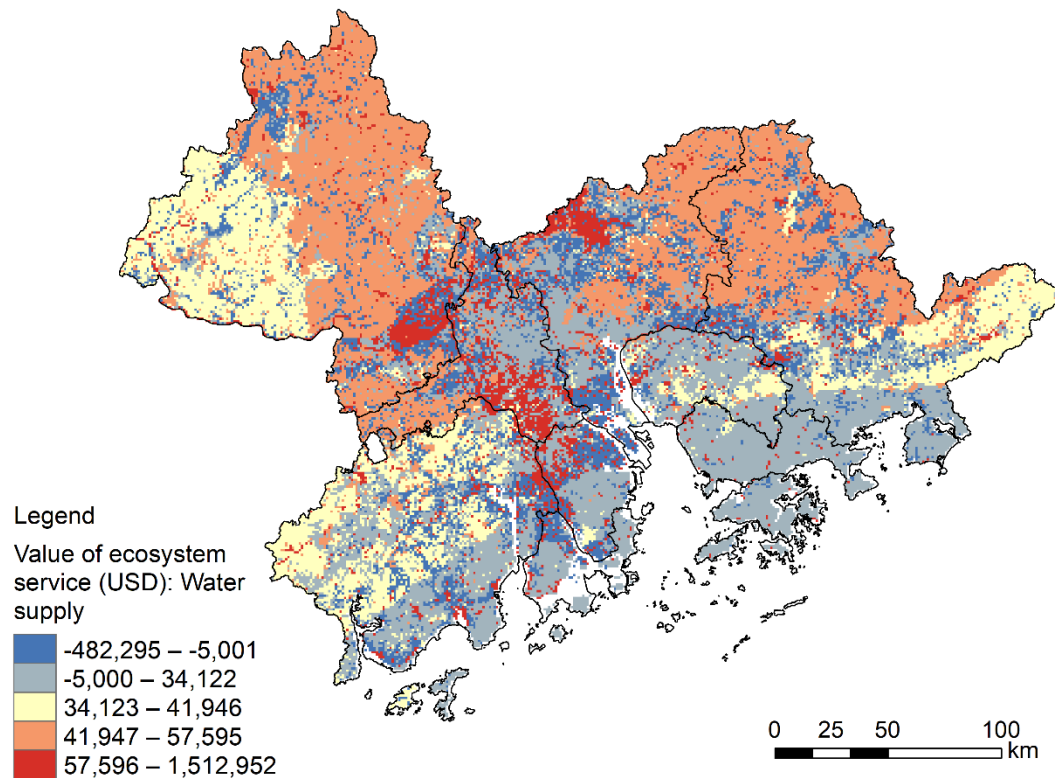

Figure S3. Value of ecosystem service (USD): Water supply (WS).

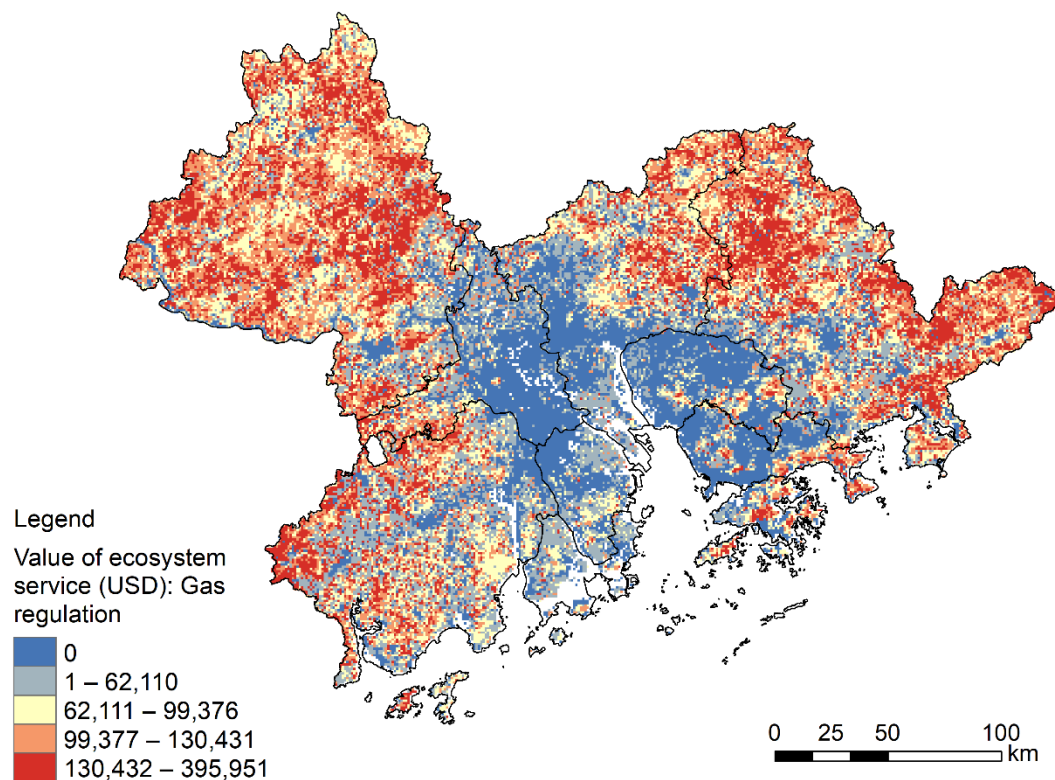

Figure S4. Value of ecosystem service (USD): Gas regulation (GR).

Supplementary Materials

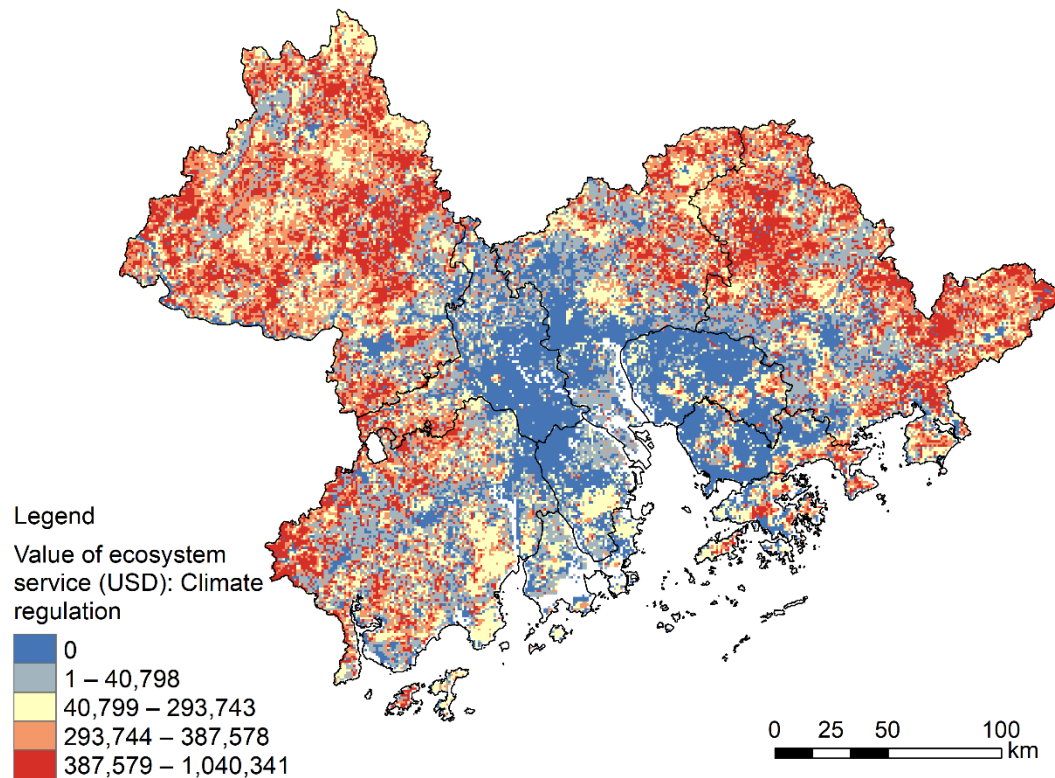

Figure S5. Value of ecosystem service (USD): Climate regulation (CR).

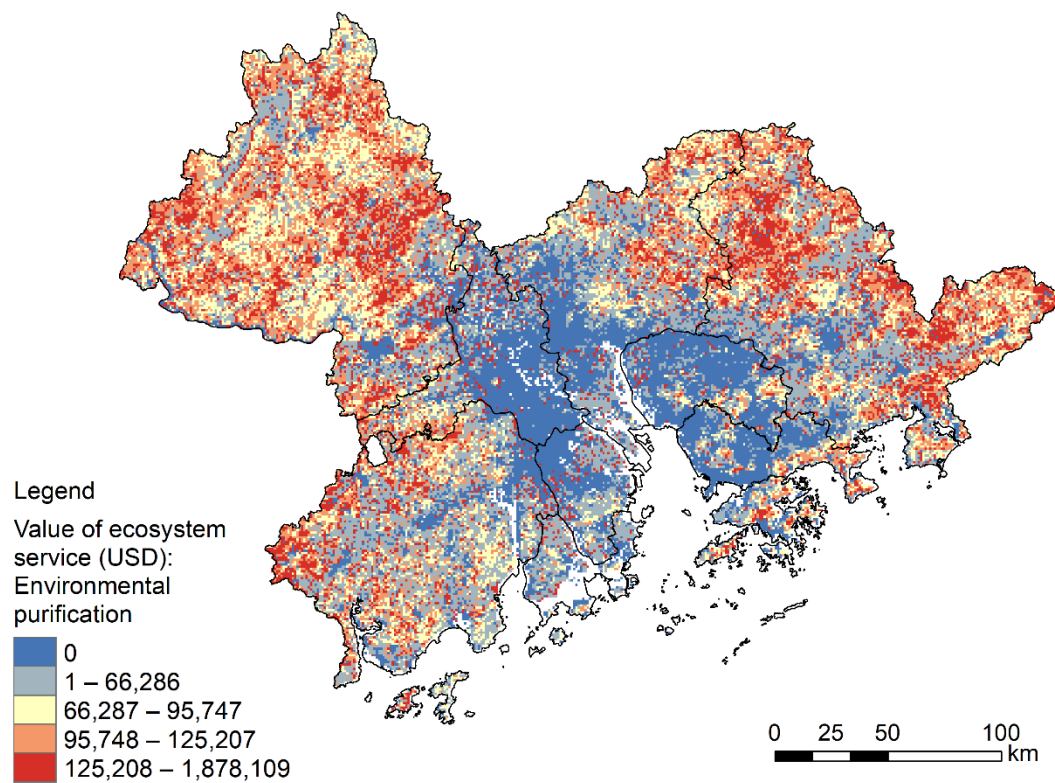

Figure S6. Value of ecosystem service (USD): Environmental purification (EP).



Supplementary Materials

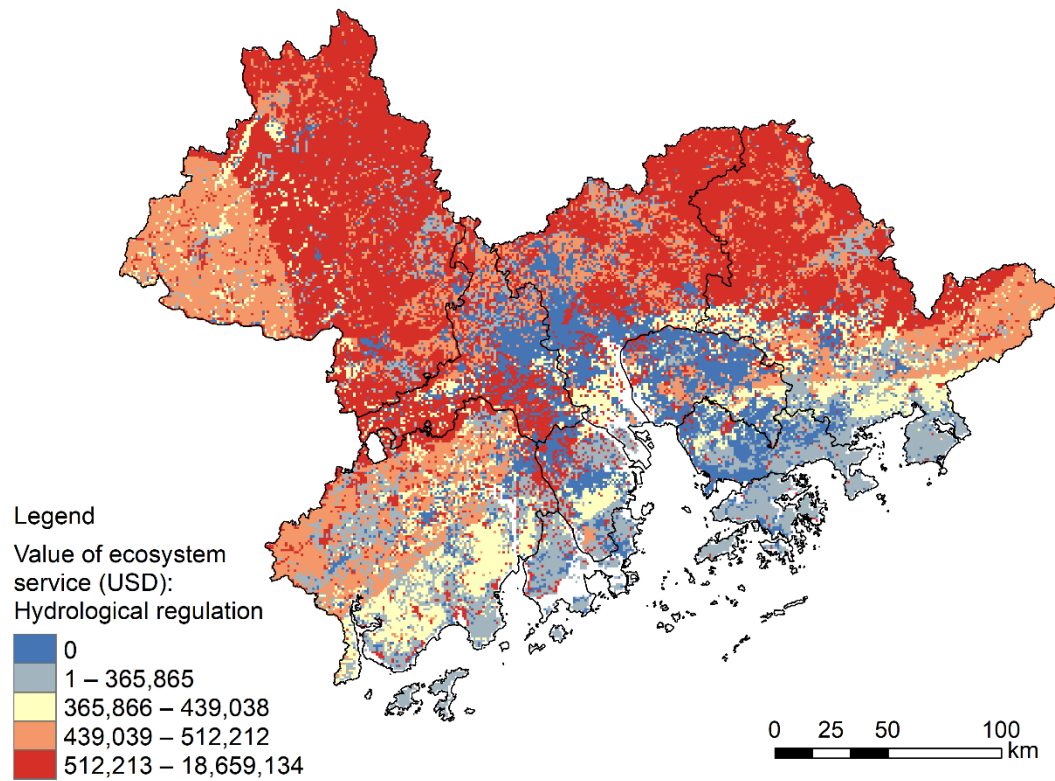

Figure S7. Value of ecosystem service (USD): Hydrological regulation (HR).

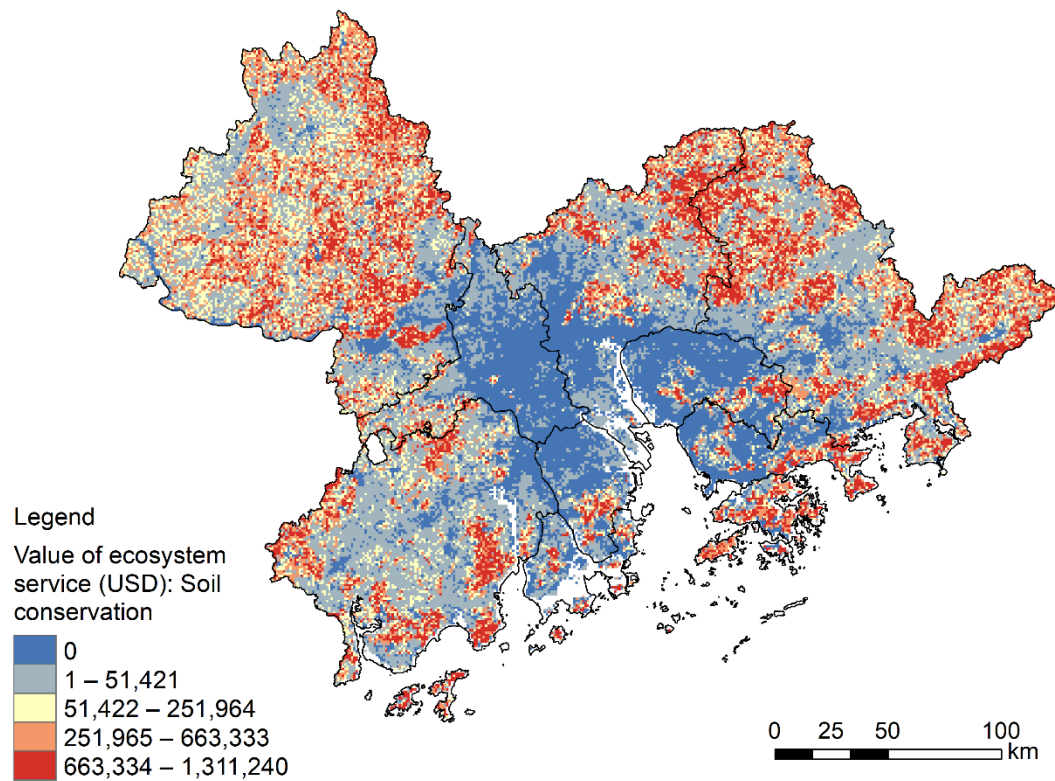

Figure S8. Value of ecosystem service (USD): Soil conservation (SC).

Supplementary Materials

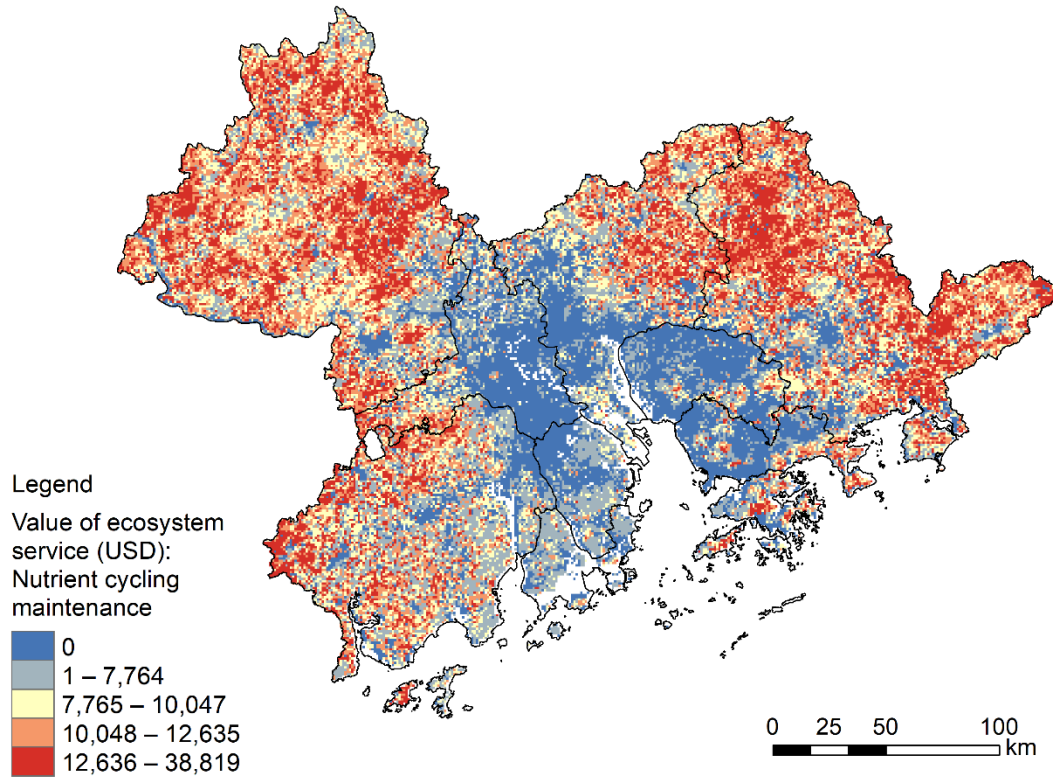

Figure S9. Value of ecosystem service (USD): Nutrient cycling maintenance (NCM).

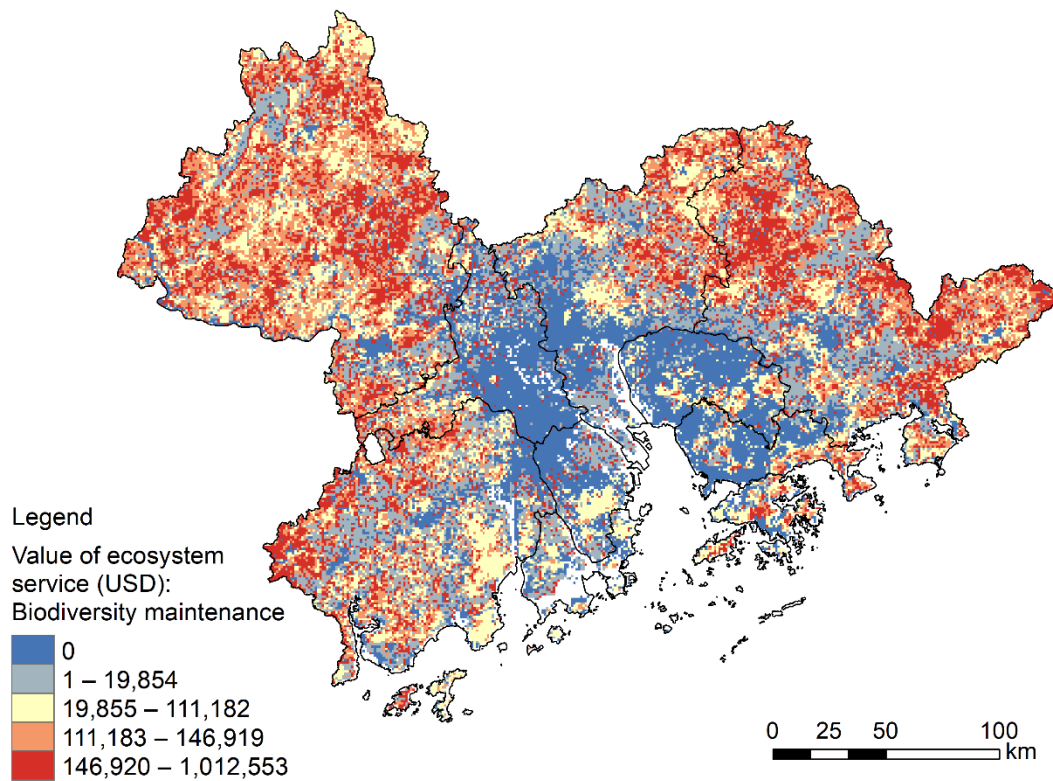

Figure S10. Value of ecosystem service (USD): Biodiversity maintenance (BM).

**Supplementary Materials**

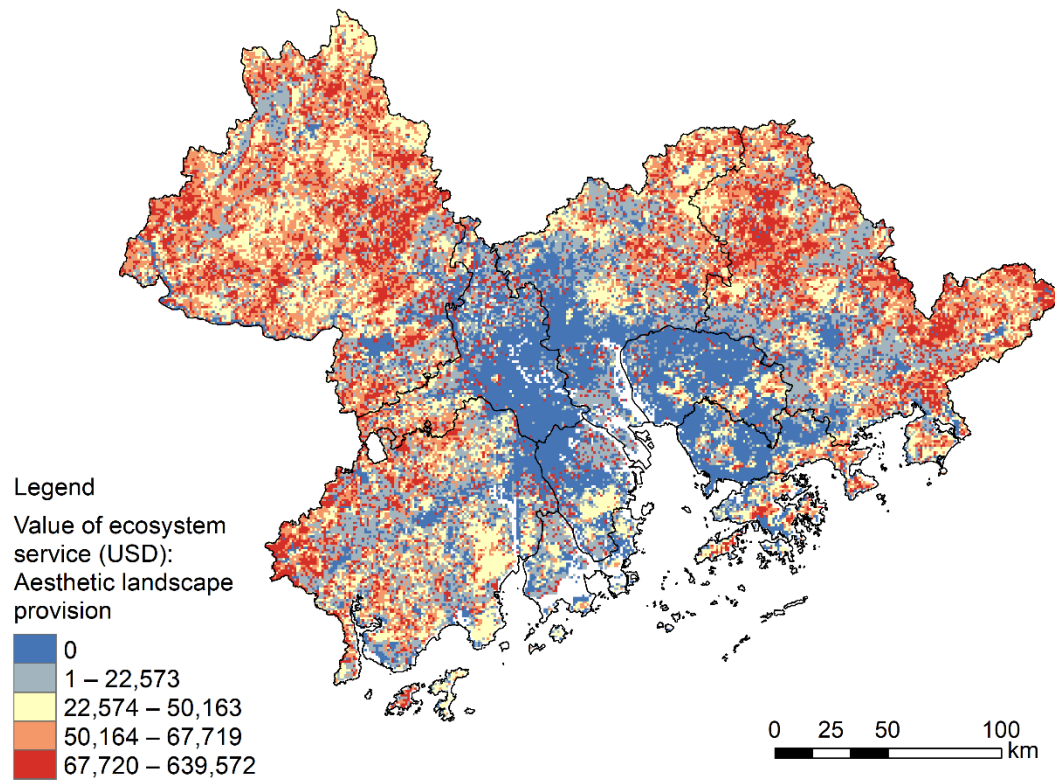

Figure S11. Value of ecosystem service (USD): Aesthetic landscape provision (ALP).
